# Supplementary material
Source: MDPI journal article supplement (https://www.mdpi.com/2073-4441/9/9/661)
Supplement: s1 [file s1]

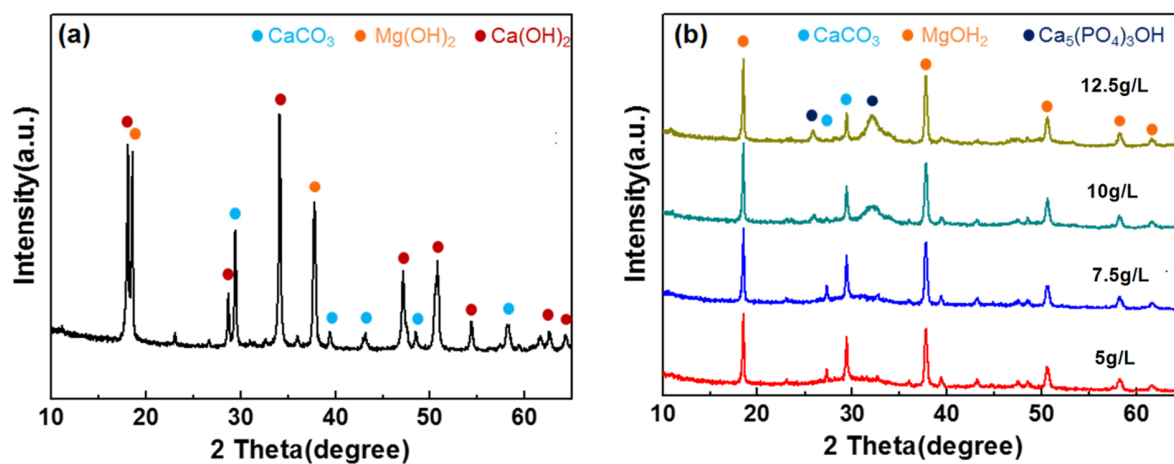

**Figure S1.** Powder X-ray diffraction patterns of (a) dolomite kiln dust powder and (b) final products at the different amount of dolomite kiln dust
